# Supplementary material for: Long term investigation of the stability of gaseous standard reference materials
Source: Royal Society of Chemistry journal article supplement (doi:10.1039/d2ay00566b), 1977-01-01
Supplement: d2ay00566b1.pdf [file d2ay00566b1.pdf]

1 **Selection and colorimetric application of ssDNA aptamers**  
2 **against metamitron based on magnetic bead-SELEX**

3 Xicheng Xie<sup>a, #</sup>, Weiwen Huang<sup>a, #</sup>, Guoqing Shen<sup>a, b, c, d</sup>, Hong Yu<sup>a, b</sup>,  
4 Lumei Wang<sup>a, b, c, d</sup>\*

5 *<sup>a</sup> Shanghai Jiao Tong University YunNan (Dali) Research Institute, Dali, Yunnan*  
6 *671000, China*

7 *<sup>b</sup> School of Agriculture and Biology, Key Laboratory of Urban Agriculture, Ministry*  
8 *of Agriculture, Bor S. Luh Food Safety Research Center, Shanghai Jiao Tong*  
9 *University, Shanghai 200240, PR China*

10 *<sup>c</sup> Shanghai Yangtze River Delta Eco-Environmental Change and Management*  
11 *Observation and Research Station, Ministry of Science and Technology, Ministry of*  
12 *Education, 800 Dongchuan Rd., Shanghai 200240, China*

13 *<sup>d</sup> Shanghai Urban Forest Ecosystem Research Station, National Forestry and*  
14 *Grassland Administration, 800 Dongchuan Rd., Shanghai 200240, China*

15 *<sup>#</sup> These authors contributed equally to this work and should be considered co-first*  
16 *authors*

17 *\* Corresponding author, E-mail: zjuwlm@163.com; Tel: +86-21-34206922; Fax:*  
18 *+86-21-34205762.*

19

## 20 **2.Materials & Methods**

### 21 *Affinity tests for candidate by Ultrafiltration Method*

22 (1) Candidate aptamers were prepared into DNA solutions with concentrations of 10 nm, 20  
23 nm, 40 nm, 60 nm, 80 nm, 100 nm, 150 nm and 200 nm using binding buffer. They were heated  
24 and denatured at 95 ° C for 6 min, then quickly transferred to ice for 10 min and put at room  
25 temperature for 5 min.

26 (2) 100 μL of the above solutions was absorbed respectively in a 1.5 ml centrifuge tube, 100  
27 ml of 20 μM MTM solution was added and mixed well. Then the mixture was incubated at 25 ° C  
28 for 30 min.

29 (3) After the incubation, pipetted the reaction solution into the ultrafiltration tube (ultra-0.5  
30 centrifugal filter (10 KD)), used the high-speed centrifuge to adjust the rotating speed to 12000  
31 rpm, centrifuged for 5 min, and finally the filtrate was collected. In the filtration process, ssDNA  
32 that failed to bind to the target and ssDNA-MTM complex produced by ssDNA that can bind to  
33 the target cannot pass through the filter element (molecules less than 10 KD). Therefore, the  
34 filtrate contained only MTM solution that failed to react with ssDNA. The MTM that can react  
35 with candidate ssDNA can be determined by measuring the concentration of benzophenone in the  
36 filtrate.

37 (4) Established the standard concentration curve of MTM. MTM has a maximum absorption  
38 peak at 312 nm. Set MTM solutions with concentrations of 0, 10, 20, 40, 60, 80, and 100 μM, and  
39 the absorbance values at 312 nm were recorded respectively to establish the standard  
40 concentration curve of MTM concentration. Therefore, the corresponding MTM concentration can  
41 be obtained by measuring the absorbance value of the filtrate in step (3) at 312 nm.

42 (5) According to the dissociation constant formula,  $y = B_{\max} \cdot X / (K_d + X)$ , Y is the  
43 concentration of MTM, X is the concentration of candidate aptamer and  $B_{\max}$  is the maximum  
44 binding concentration. The data obtained in the above process can be fitted by origin 8.0 software,  
45 and the fitted  $K_d$  is the dissociation constant  $K_d$  of candidate aptamers and benzophenone.

### 46 *Preparation of AuNPs*

47 Traditionally<sup>1</sup>, the AuNPs solution was prepared by sodium citrate reduction of HAuCl<sub>4</sub>  
48 solution. First, all the glassware used in the experiment was cleaned using freshly prepared 1:3  
49 (v/v) HNO<sub>3</sub>/HCl solution, then rinsed in ultrapure water thoroughly and dried at 50 °C. 10.5 mL  
50 of 1% (w/v) trisodium citrate solution was added to the boiling solution of HAuCl<sub>4</sub>·4H<sub>2</sub>O (100  
51 mL, 0.03%, w/w) quickly and continued to heat and stirred for 30 min to synthesize AuNPs.  
52 During this period, the color of the solution gradually changed from colorless to gray, blue, dark  
53 purple to wine red. Then stop heating and stir automatically until the solution is completely cooled  
54 to room temperature. Finally, the cooled AuNPs solution was filtered with 0.22 μm ultrafiltration  
55 membranes, and the filtrate was stored in dark glass bottle at 4 °C for further use.

### 56 *Optimization of the experimental conditionals*

57 For the better performance in sensitivity and selectivity of this colorimetric detection assay,  
58 the experimental conditions including concentration of NaCl, concentration of the aptamer, pH of  
59 the system, temperature of incubation were optimized. Each experiment was repeated for at least  
60 three times.

61 For the optimization of NaCl concentration, different volumes (0, 5, 10, 15, 20, 25, 30, 35, 40,  
62 and 45μL) of 2 M NaCl standard solution were added respectively to 1.5 mL centrifugation tubes

63 containing 200  $\mu$ L AuNPs. The final concentration of NaCl in each tube was set at 0, 20, 40, 60,  
64 80, 100, 120, 140, 160, 180 mm respectively, and MOPS buffer was used to supplement the  
65 system to 500  $\mu$ L. After 30 minutes of incubation at 25°C, the absorbance at 650 nm ( $A_{650}$ ) and  
66 520 nm ( $A_{520}$ ) of each solution were measured. The above steps were repeated three times. The  
67 average value of the absorbance ratio  $A_{650}/A_{520}$  was plotted as the ordinate, which could reach the  
68 maximum value when AuNPs was completely aggregated by the NaCl solution, while the NaCl  
69 concentration was the abscissa. The minimum concentration of NaCl that fully aggregated AuNPs  
70 was chosen as the optimal concentration.

71 To obtain the optimal concentration of aptamer, The aptamer with different final  
72 concentration (0, 4, 6, 8, 10, 12, 14, 16, and 18 nM) was added to the sample system contained  
73 1 $\mu$ M MTM (A) and the blank system without MTM ( $A_0$ ) respectively, then the system was  
74 supplemented with MOPS buffer. All systems were incubated for 30 min and then added 200  $\mu$ L  
75 AuNPs, and incubated for 30 min to fully combine aptamer and AuNPs. Finally, added the  
76 optimized concentration of NaCl. After incubating for 10 min,  $A_{650}/A_{520}$  of the sample system (A)  
77 and the blank system ( $A_0$ ) were obtained and the value  $\Delta A$  ( $\Delta A=A-A_0$ ) at each aptamer  
78 concentration was calculated. The concentration that induced the maximum value of  $\Delta A$  was  
79 chosen as the optimal aptamer concentration.

80 To optimize the pH of system, considering the instability of MTM under alkaline conditions,  
81 set the pH of the MOPS buffer of the colorimetric detection system in the above optimization step  
82 to 3, 4, 5, 6 and 7 respectively, and then the optimized concentration of aptamer and MTM were  
83 added to the system. The experimental steps and determination methods are the same as the above  
84 step of the optimization of aptamer concentration. The pH enabled the  $\Delta A$  to reach the maximum  
85 value was selected as the optimal pH of the system.  
86 Set the incubation temperature of the reaction system to 20 ° C, 25 ° C, 30 ° C, 35 ° C and 40 ° C  
87 respectively. The optimization operation is the same as the above steps. The incubation  
88 temperature corresponding to the maximum value of  $\Delta A$  is the optimal temperature of the  
89 colorimetric detection system.

90

## 91 **Result**

### 92 ***Characterization of colorimetric assay based on AuNPs***

93 The concentration of AuNPs solution can also be calculated according to Lambert-Beer's law and  
94 the UV absorbance at 450 nm, and the formula is  $c = A_{450} / \epsilon_{450} \cdot B$ , where c is the concentration of  
95 AuNPs solution; A is the UV absorbance of AuNPs solution at 450 nm;  $\epsilon$  is the molar extinction  
96 coefficient of AuNPs; B is the average diameter of free AuNPs. Molar extinction coefficient of 20  
97 nm AuNPs ( $\epsilon_{450}$ ) is about  $5.41 \times 10^{-8} \text{ M}^{-1} \cdot \text{cm}^{-1}$ . Therefore, the concentration of AuNPs solution in  
98 this experiment is  $4.332 \times 10^{-4} \text{ M}$ .

99

100

101

102

103

104

105

106

**Table S1** The main experimental instruments

| Apparatus name                                  | Specification          | Manufacturer                                         |
|-------------------------------------------------|------------------------|------------------------------------------------------|
| Electronic analytical balance                   | BS124S                 | Saidoris scientific instrument (Beijing) Co., Ltd    |
| Constant temperature magnetic stirrer           | 08 - 2G                | Shanghai meiyingpu Instrument Manufacturing Co., Ltd |
| pH meter                                        | PHS-2F                 | Shanghai Yidian Scientific Instrument Co., Ltd       |
| Millipore-MilliQ Barnstead                      | Milli-Q Advantage A109 | Millipore, USA                                       |
| High-speed desktop refrigerated centrifuge      | Centrifuge 5424        | Eppendorf                                            |
| Constant temperature incubator                  | ThermoStat Plus        | Eppendorf                                            |
| Micro pipette gun                               | Different ranges       | Eppendorf                                            |
| Centrifugal tube                                | 1.5 mL                 | Thermo Fisher Scientific                             |
| 96 well micro medium                            | F605033                | Shenggong Bioengineering (Shanghai) Co., Ltd         |
| Magnetic separation frame                       | 16 holes               | Shanghai Dadi chemical products Co., Ltd             |
| Horizontal electrophoresis instrument           | PowerPac Basic         | Bio-Rad                                              |
| Full temperature shaking incubator              | HZQ-F160               | Suzhou Peiyong Experimental Equipment Co., Ltd       |
| PCR instrument                                  | T100 Thermal Cycler    | Bio-Rad                                              |
| Electric constant temperature water bath        | XMTE-8112              | Shanghai Jinghong Experimental Equipment Co., Ltd    |
| ultramicro spectrophotometer                    | NanoDrop 2000          | Thermo Fisher Scientific                             |
| Circular dichroic chromatograph                 | CD/J-815               | JASCO                                                |
| Field emission transmission electron microscope | TALOS F200X            | FEI                                                  |
| Nano Particle Analyzer                          | Zetasizer Nano S       | Malvern                                              |
| Multifunctional enzyme labeling instrument      | Infinite M200 Pro      | Tecan Trading AG                                     |

110

**Table S2** The conditions for aptamer selection

| Screening rounds | Molar amount of the library (pmol) | Reverse screening content                 |                                      | Positive screening | Incubation time (min) |
|------------------|------------------------------------|-------------------------------------------|--------------------------------------|--------------------|-----------------------|
|                  |                                    | carboxyl magnetic beads ( $\mu\text{L}$ ) | MBZ magnetic beads ( $\mu\text{L}$ ) |                    |                       |
| 1                | 500                                | 100                                       | —                                    | 100                | 60                    |
| 2                | 500                                | —                                         | 100                                  | 100                | 60                    |
| 3                | 500                                | —                                         | 100                                  | 100                | 60                    |
| 4                | 500                                | —                                         | 100                                  | 100                | 60                    |
| 5                | 500                                | —                                         | 100                                  | 100                | 60                    |
| 6                | 500                                | —                                         | 100                                  | 100                | 60                    |
| 7                | 500                                | —                                         | 100                                  | 100                | 60                    |
| 8                | 100                                | —                                         | 100                                  | 100                | 60                    |
| 9                | 100                                | —                                         | 100                                  | 100                | 60                    |
| 10               | 100                                | —                                         | 100                                  | 100                | 60                    |

111

112

**Table S3** PCR reaction system

| Type                           | Concentration ( $\mu\text{M}$ ) | Volume ( $\mu\text{L}$ ) |
|--------------------------------|---------------------------------|--------------------------|
| ssDNA template                 | —                               | 3                        |
| Forward primer                 | 0.5                             | 1                        |
| Reverse primer                 | 500                             | 1                        |
| 2×HiFiTaq PCR StarMix with Dye | —                               | 25                       |
| ddH <sub>2</sub> O             | —                               | 22                       |

113

114

**Table S4** PCR reaction cycle

| Process            | Temperature ( $^{\circ}\text{C}$ ) | Time (min) |
|--------------------|------------------------------------|------------|
| Pre denaturation   | 95                                 | 5          |
| denaturation       | 95                                 | 0.5        |
| annealing          | 57                                 | 0.5        |
| extend             | 72                                 | 0.5        |
| ddH <sub>2</sub> O | 72                                 | 5          |

115

116

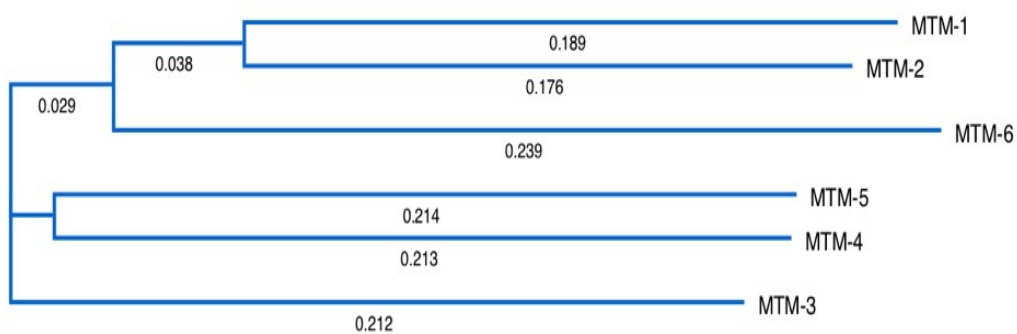

117

118

119

120

**Fig S1** The homology analysis of metamitron aptamer

**Table S5** The relative standard deviation ( $\sigma$ ) of the instrument

| No.               | 1     | 2     | 3     | 4     | 5     | 6     | 7     | 8     | $\sigma$              |
|-------------------|-------|-------|-------|-------|-------|-------|-------|-------|-----------------------|
| $A_{650}/A_{520}$ | 0.124 | 0.124 | 0.124 | 0.123 | 0.123 | 0.123 | 0.123 | 0.123 | $4.71 \times 10^{-4}$ |

121

122

(a)

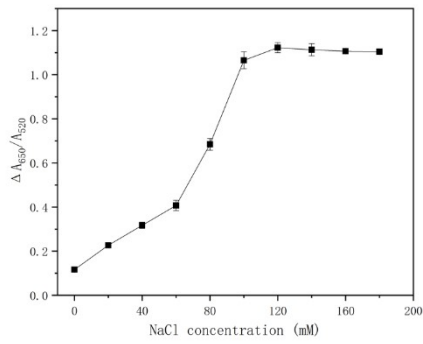

(b)

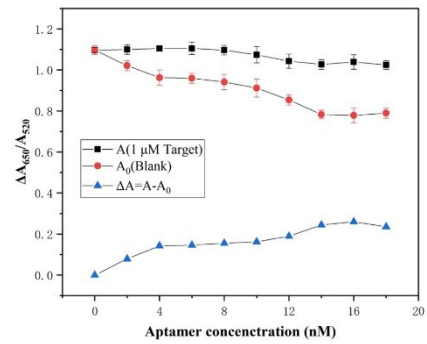

(c)

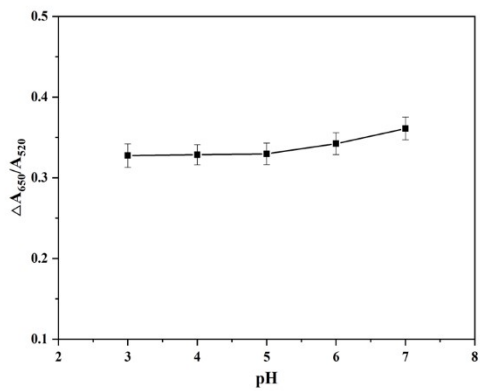

(d)

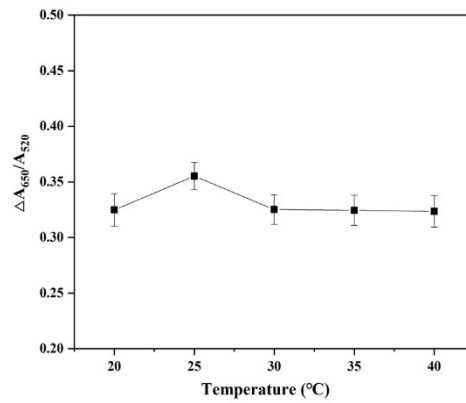

123

124 **Fig S2** Optimization of experimental conditions. (a) Optimization of NaCl concentration; (b)  
125 optimization of aptamer concentration. (c) Optimization of pH; (d) optimization of temperature  
126

127 **Table S6** Determination of spiked in tap water, river water, lake water, and artificial urine (n=3).  
128 Experimental conditions: MOPS (10 nM, pH=7.0), 16 nM Aptamer, 120mM NaCl, 200 mL AuNPs,  
129 and 100, 200 and 300 nM MTM

| Sample      | Spiked concentration (nM) | Mean found concentration (nM) | Recovery (%) | RSD (%) |
|-------------|---------------------------|-------------------------------|--------------|---------|
| Tap water   | 100                       | 102.04                        | 102.04       | 3.34    |
|             | 200                       | 202.43                        | 101.22       | 1.75    |
|             | 300                       | 301.48                        | 100.49       | 1.77    |
| River water | 100                       | 107.83                        | 107.83       | 2.46    |
|             | 200                       | 203.21                        | 101.61       | 1.19    |
|             | 300                       | 304.91                        | 101.64       | 1.59    |
| Lake water  | 100                       | 102.73                        | 102.73       | 2.76    |
|             | 200                       | 204.99                        | 102.49       | 1.46    |
|             | 300                       | 305.85                        | 101.95       | 1.21    |
| Urine       | 100                       | 91.71                         | 91.71        | 2.49    |
|             | 200                       | 192.06                        | 96.03        | 1.11    |
|             | 300                       | 286.21                        | 95.40        | 3.48    |

130  
131  
132  
133  
134

## 135 **References**

- 136 1. Y. Wu, S. Zhan, H. Xing, L. He, L. Xu and P. Zhou, *Nanoscale*, 2012, **4**, 6841-6849.  
137 2. W. Haiss, N. T. K. Thanh, J. Aveyard and D. G. Fernig, *Analytical Chemistry*, 2007, **79**, 4215-  
138 4221.  
139  
140
